# Supplementary material for: Potential Role of Superoxide Dismutase 3 (SOD3) in Resistance to Influenza A Virus Infection
Source: MDPI journal article supplement (doi:10.3390/antiox12020354), 2023-02-02
Supplement: s1 [file s1]

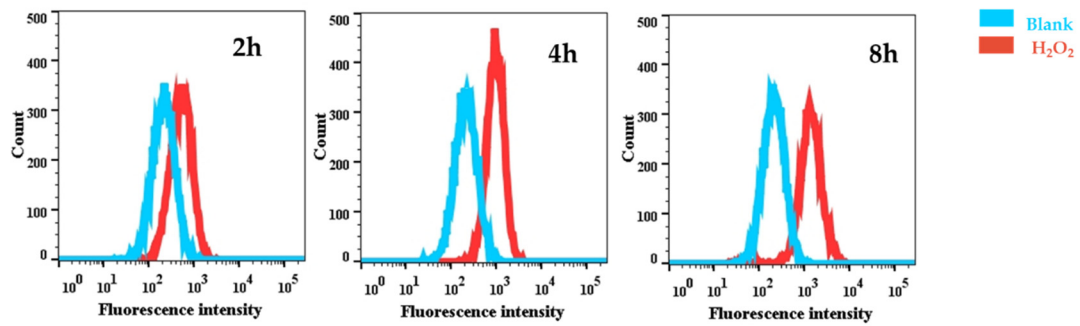

**Figure S1.** H<sub>2</sub>O<sub>2</sub> treatment induced intracellular ROS production. Mean DCF fluorescence was determined by flow cytometry at various time points after H<sub>2</sub>O<sub>2</sub> treatment.

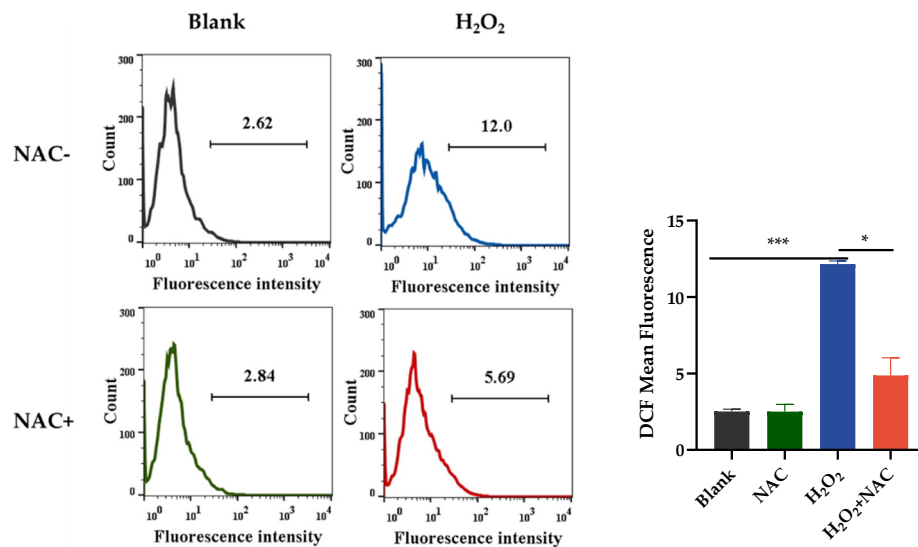

**Figure S2.** NAC treatment reduced H<sub>2</sub>O<sub>2</sub>-induced ROS production. ROS levels in A549 cells were analyzed by DCFH-DA via flow cytometry (n=3). Data are expressed as the mean  $\pm$  SEM. \*p<0.1, \*\*\* p < 0.001.

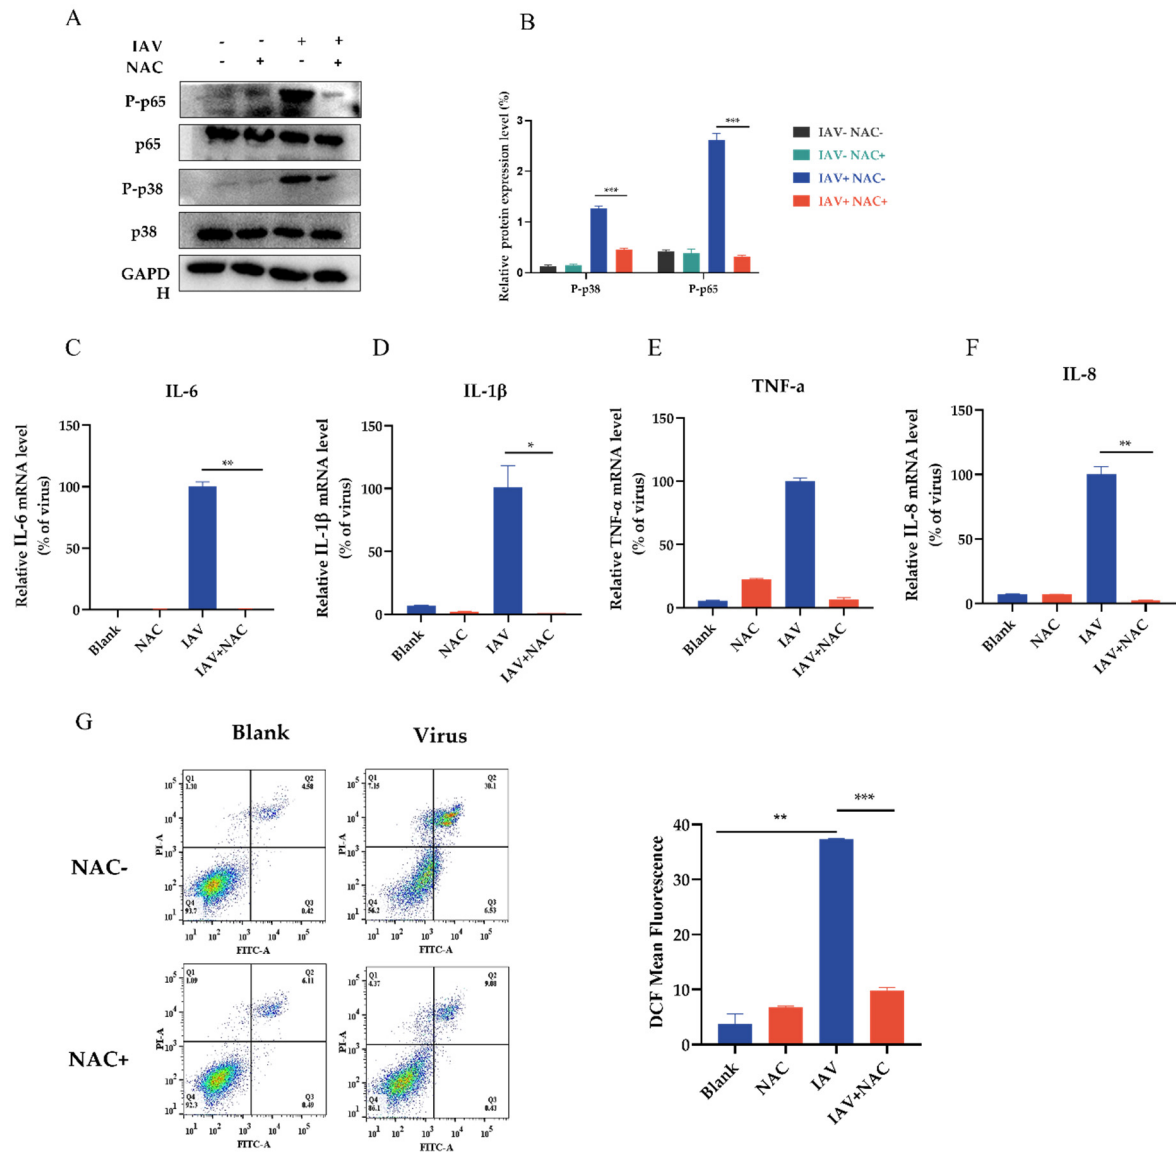

**Figure S3.** NAC treatment inhibited cellular inflammation and apoptosis induced by IAV. (A, B) The expression of p65, Pp65, p38 and Pp38 in A549 cells. mRNA level of IL-6(C), IL-1 $\beta$  gene(D), TNF- $\alpha$  (E), IL-8 (F) in virus-infected cells. (G) The effect of NAC in IAV induced apoptosis. Data are expressed as the mean  $\pm$  SEM. \* $p < 0.1$ , \*\* $p < 0.01$ , \*\*\* $p < 0.001$ , ns means no significance.
